# Supplementary material
Source: publisher figshare collection journal article supplement (https://tandf.figshare.com/ndownloader/files/17132282)
Supplement: Supplementary file 1 [file 17132282]

**Supplementary Figures**

| 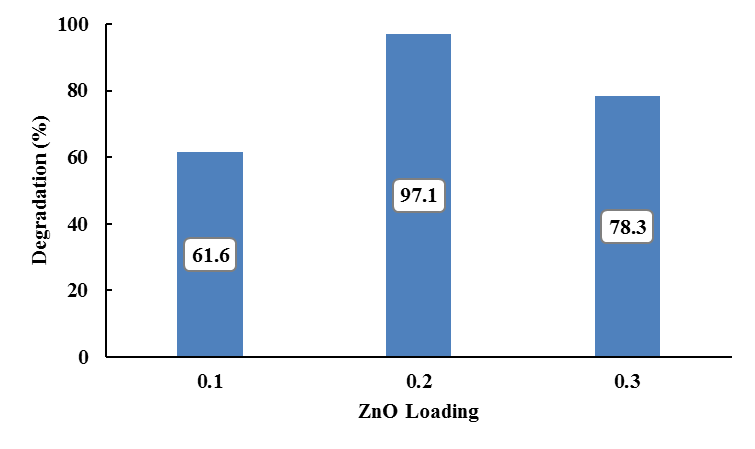 |
| --- |
| **Fig. S1. Effect of different ZnO loading in ZnO/MIL-101(Fe)[A] on the photocatalytic degradation of RhB dye under visible light irradiation (C˳: 10 mg/L, catalyst dose: 0.5 g/L, pH = 8, and Time 300 min.).** |

| 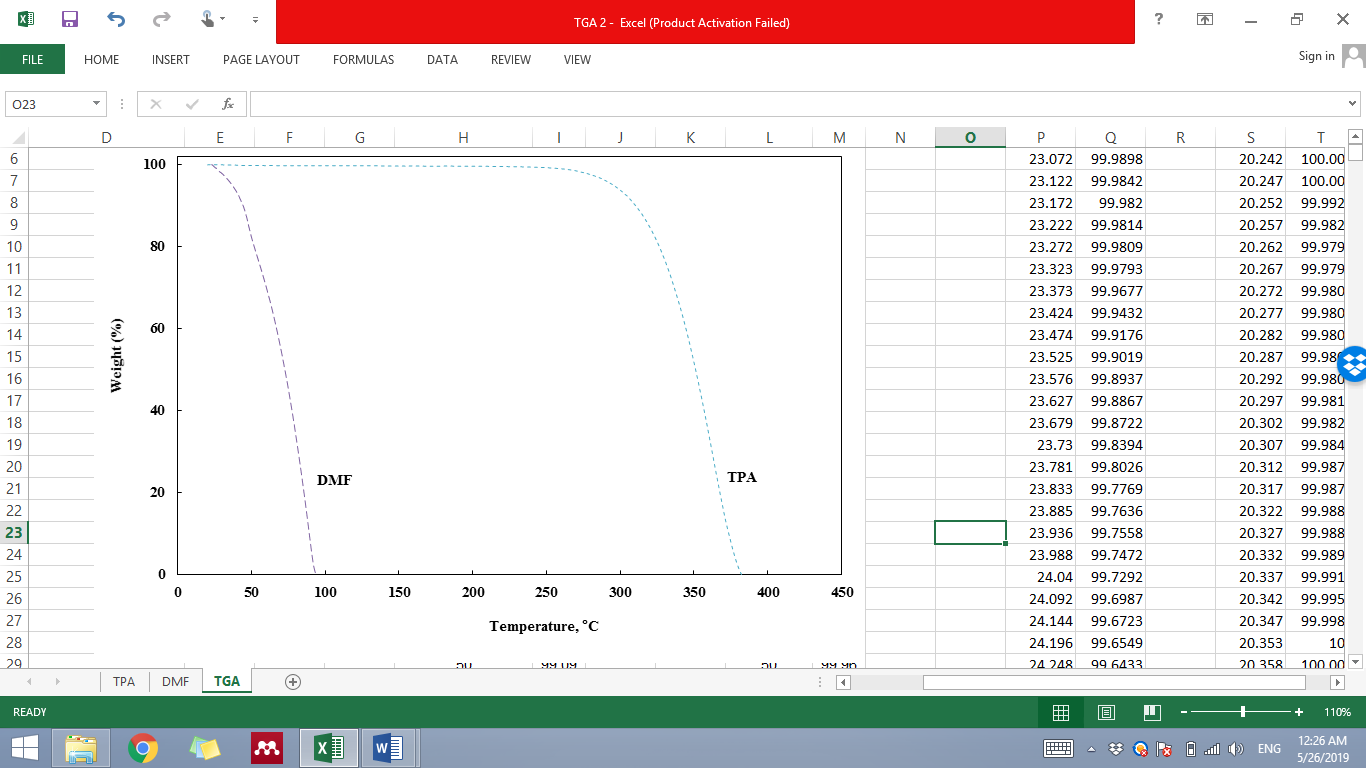 |
| --- |
| **Fig. S2. TGA curves of the solvent; N,N-dimethyl formamide (DMF); and terephthalic acid (TPA).** |
